# Supplementary material for: Protein-truncating variant in APOL3 increases chronic kidney disease risk in epistasis with APOL1 risk alleles
Source: PubMed Central journal article supplement (PMC11466179; doi:10.1172/jci.insight.181238), 2024-10-08
Supplement: jciinsight-9-181238-s143.pdf [file jciinsight-9-181238-s143.pdf]

## Supplemental Materials

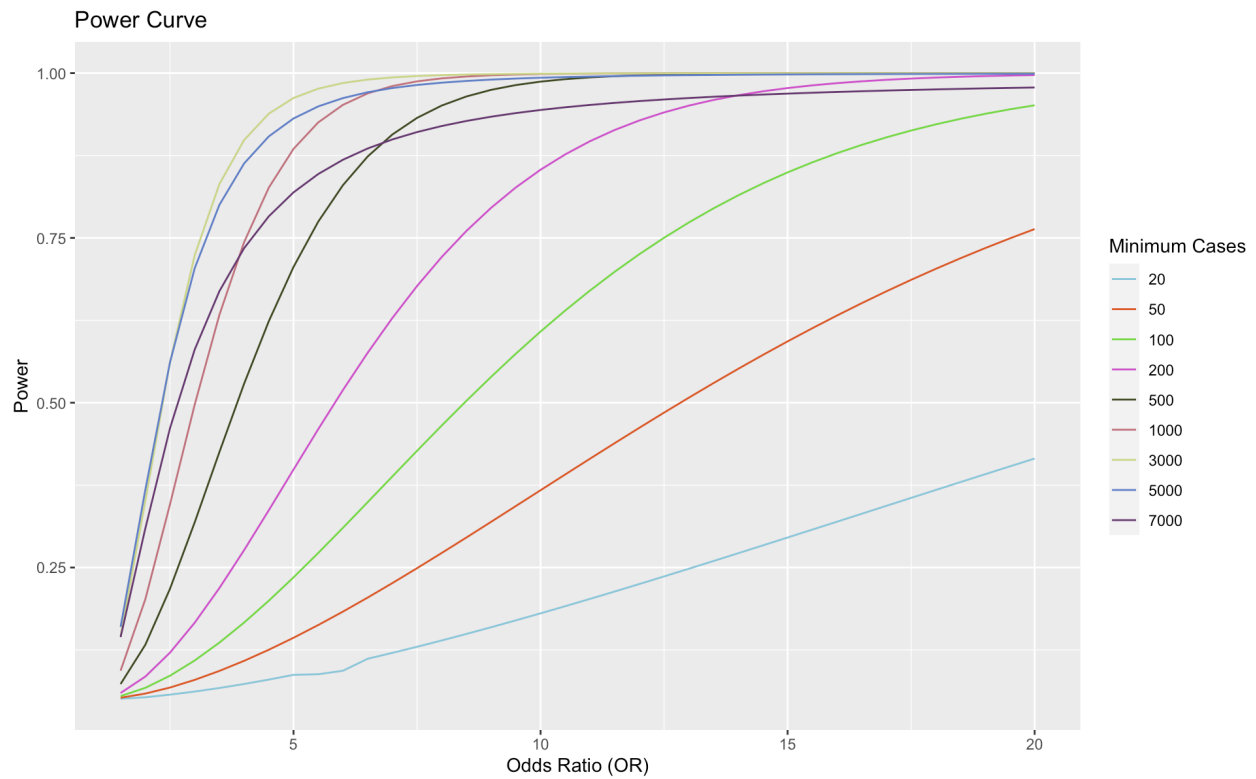

**Supplemental Figure 1. Power analysis for detecting significant associations in the PMBB AFR population.** We used a MAF threshold of 0.1% in our study cohort ( $n = 11,198$ ). Power curves plotted as a function of effect size with phenotypes of various case counts representative of phenotypes from the PMBB.

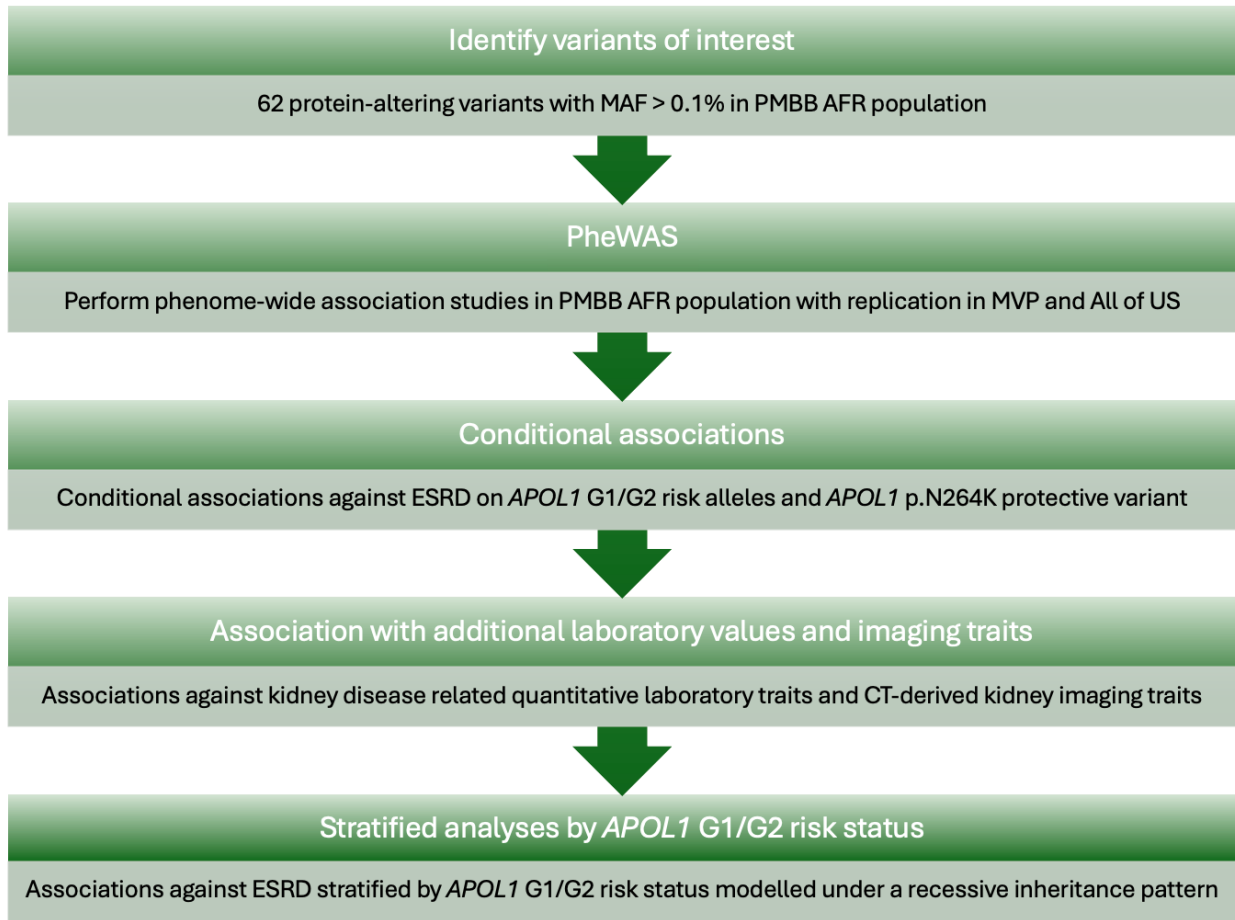

**Supplemental Figure 2. Analysis plan.** Outline of study design from identifying variants of interest to all downstream association analyses performed.

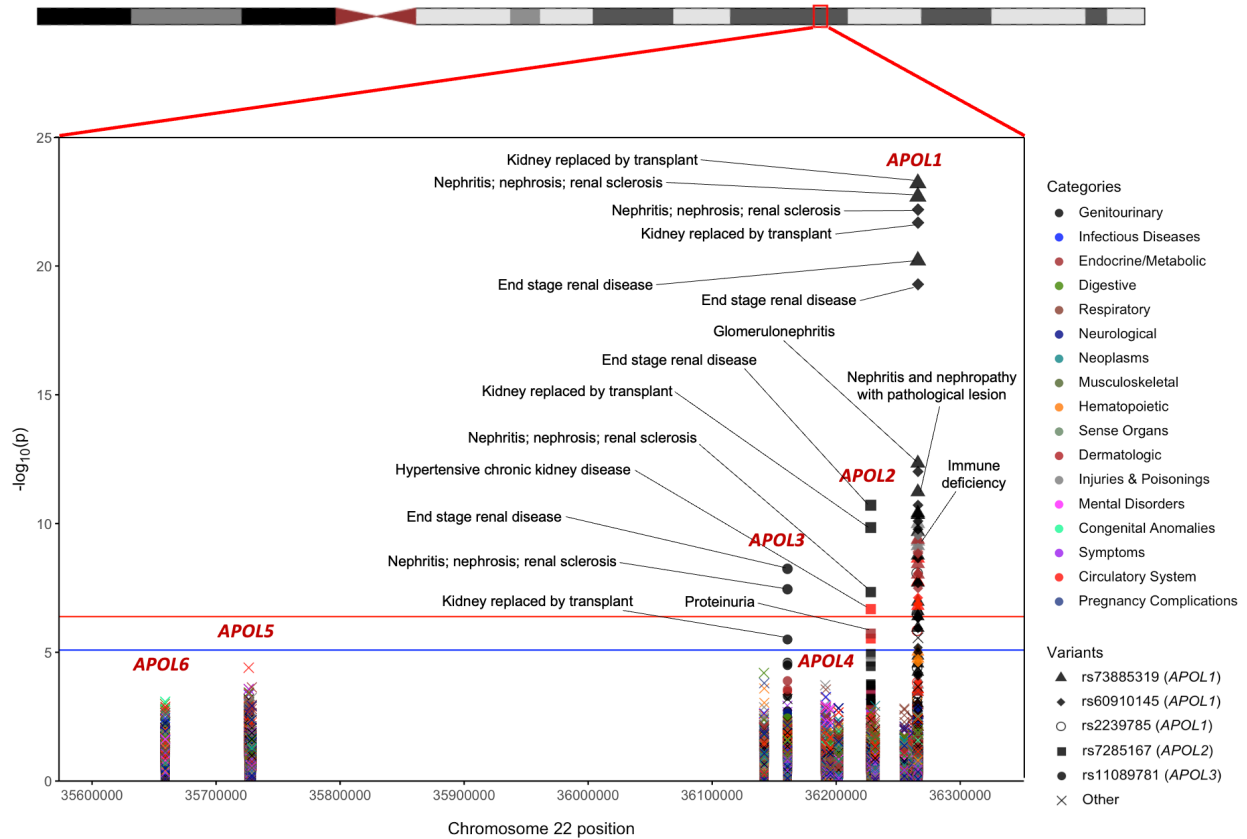

**Supplemental Figure 3. Meta-analysis of AFR and EUR PheWAS for 62 protein-altering variants in *APOL* genes.** The red line represents the Bonferroni-adjusted  $p$ -value significance threshold of  $4.10E-07$ . The blue line represents a suggestive  $p$ -value threshold of  $8.21E-06$ . Variants with at least one phenotype association above the significance threshold are listed in the legend and detailed in Supplemental Table 3.

| 1KG AFR LD ( $r^2$ ) (n = 894) |                          |                          |                          |                      |                      |                       |
|--------------------------------|--------------------------|--------------------------|--------------------------|----------------------|----------------------|-----------------------|
| rs73885319<br>(APOL1 G1)       | 1.000                    |                          |                          |                      |                      |                       |
| rs60910145<br>(APOL1 G1)       | 0.996                    | 1.000                    |                          |                      |                      |                       |
| rs71785313<br>(APOL1 G2)       | 0.052                    | 0.052                    | 1.000                    |                      |                      |                       |
| rs2239785<br>(APOL1)           | 0.152                    | 0.151                    | 0.053                    | 1.000                |                      |                       |
| rs7285167<br>(APOL2)           | 0.215                    | 0.216                    | 0.009                    | 0.089                | 1.000                |                       |
| rs11089781<br>(APOL3)          | 0.035                    | 0.036                    | 0.007                    | 0.031                | 0.134                | 1.000                 |
|                                | rs73885319<br>(APOL1 G1) | rs60910145<br>(APOL1 G1) | rs71785313<br>(APOL1 G2) | rs2239785<br>(APOL1) | rs7285167<br>(APOL2) | rs11089781<br>(APOL3) |

**Supplemental Figure 4. LD heatmap between significant meta-analyzed variants.** Includes 5 variants with significant phenotype associations and *APOL1* G1/G2 risk alleles computed using haplotypes from the 1000 Genomes Project using its GRCh38 high-coverage cohort.
